# Supplementary material
Source: PubMed Central journal article supplement (PMC4428900)
Supplement: NIHMS684200-supplement-SI.pdf [file NIHMS684200-supplement-SI.pdf]

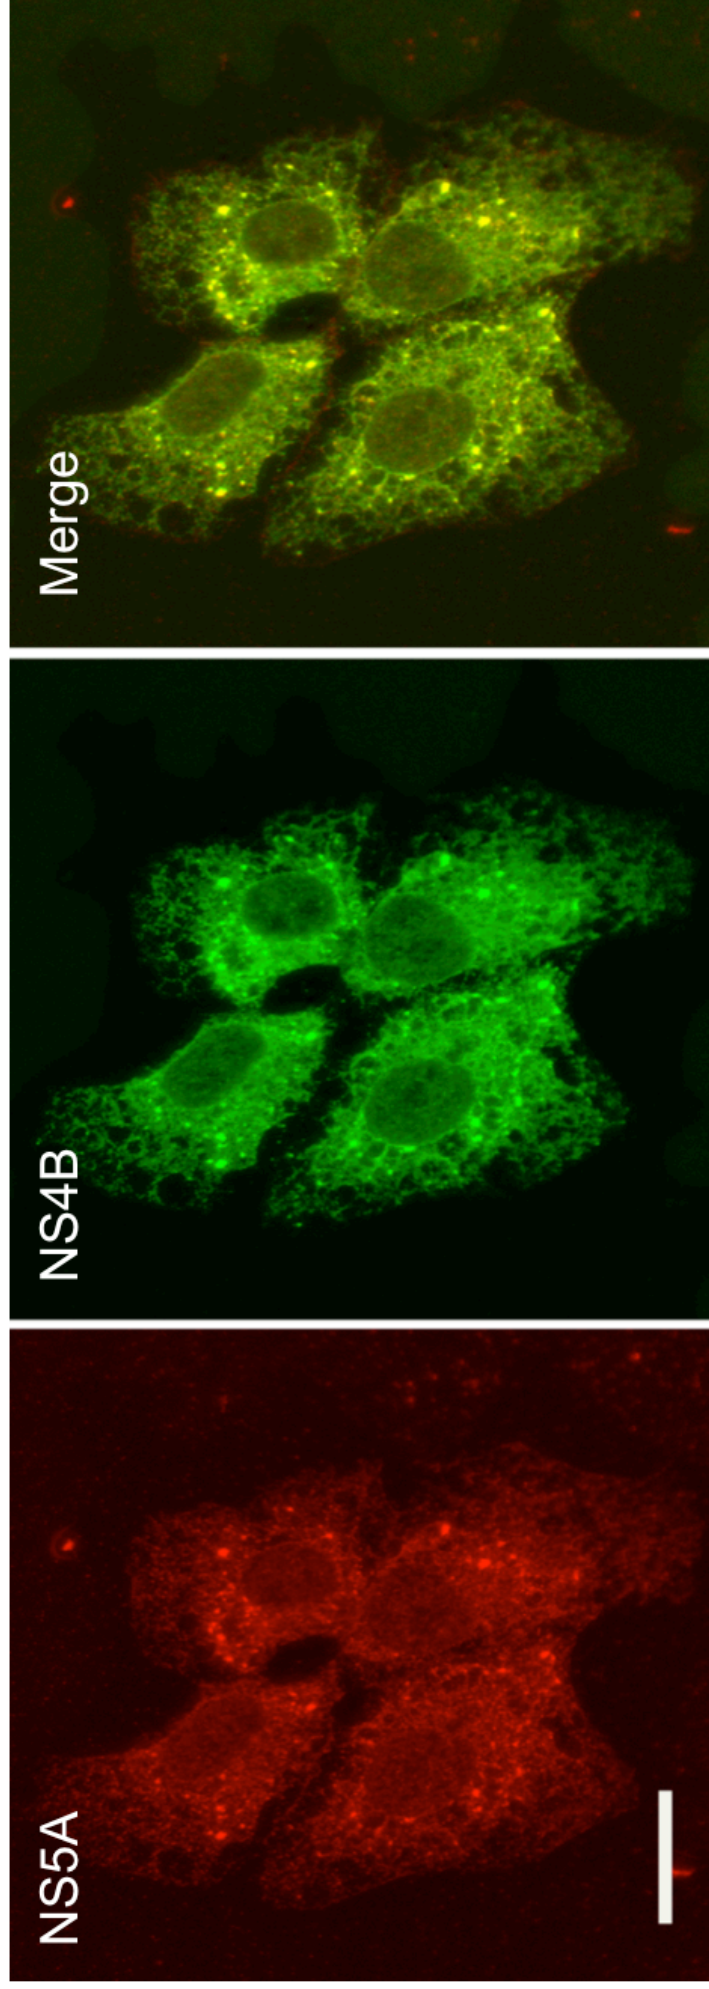

**Figure S1. Subcellular localization of NS4B and NS5A in replicon cells**

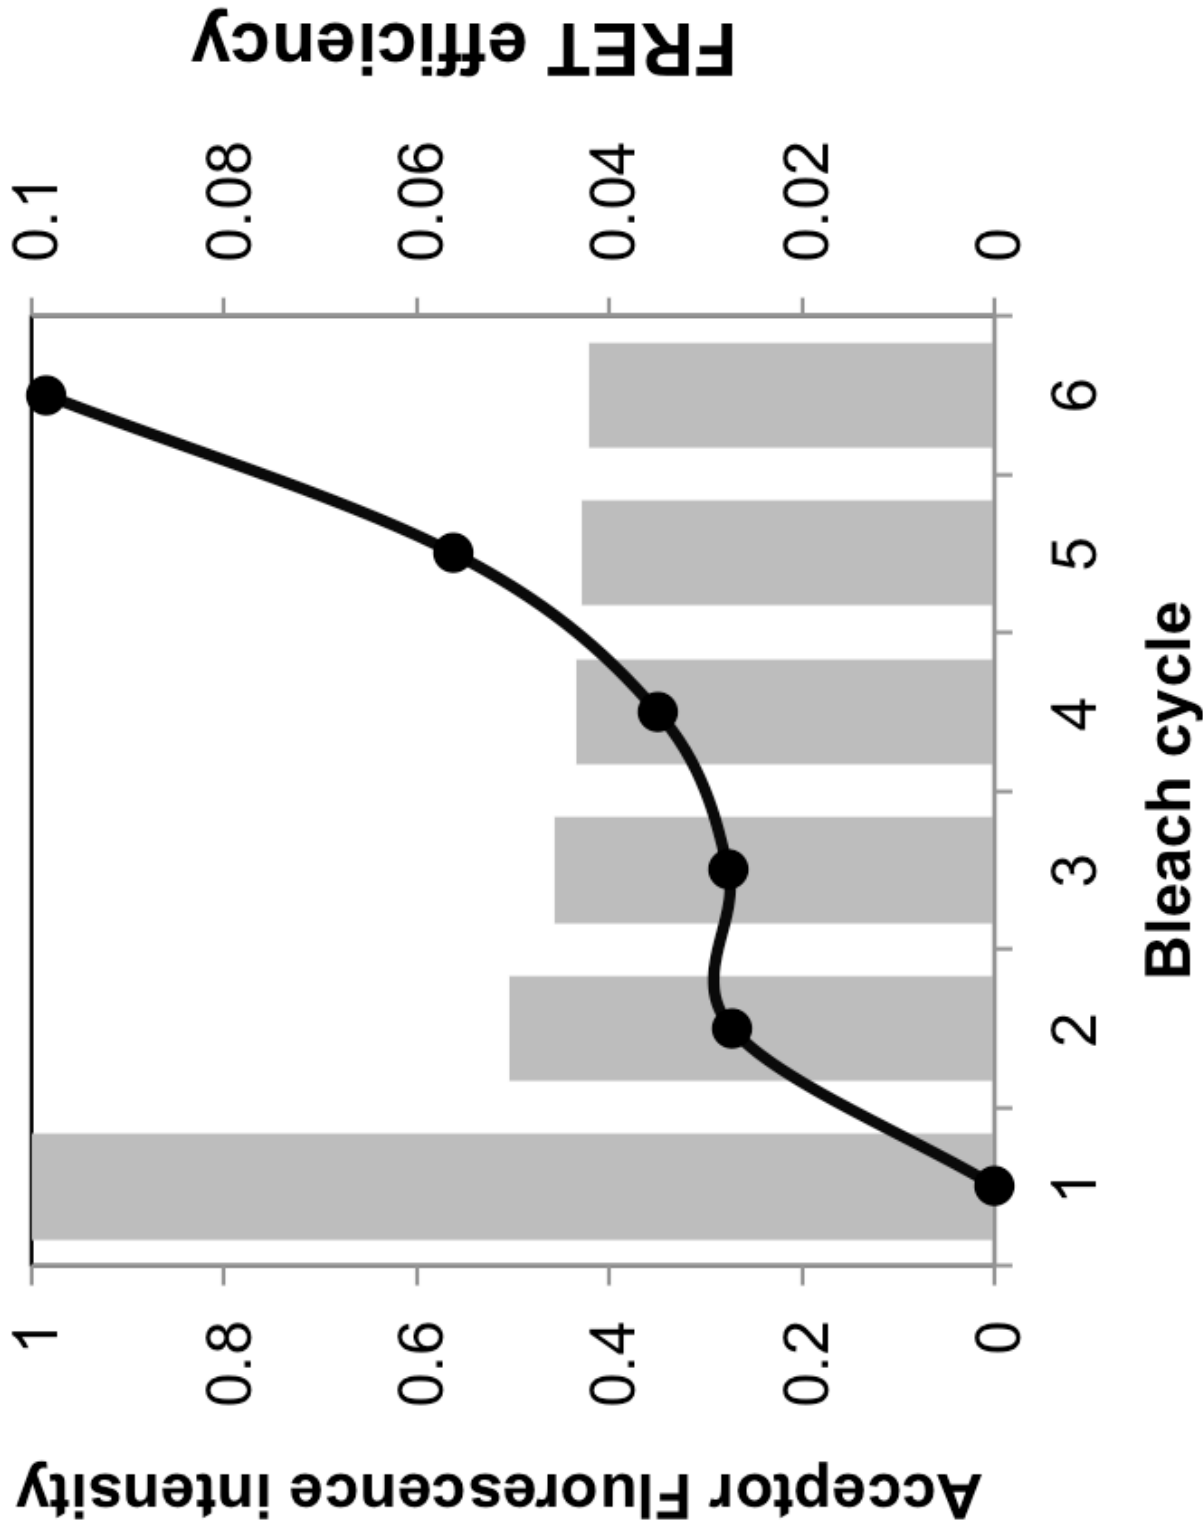

**Figure S2. A typical repetitive acceptor photobleaching experiment.**

**A**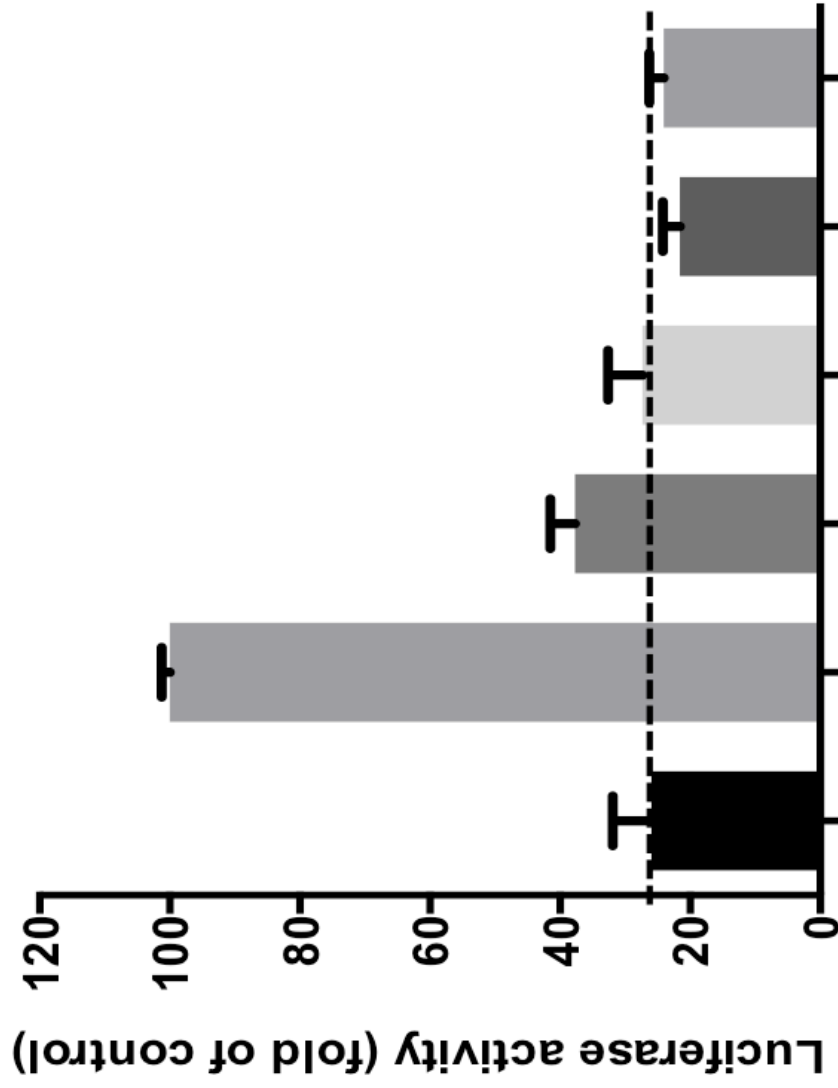**B.**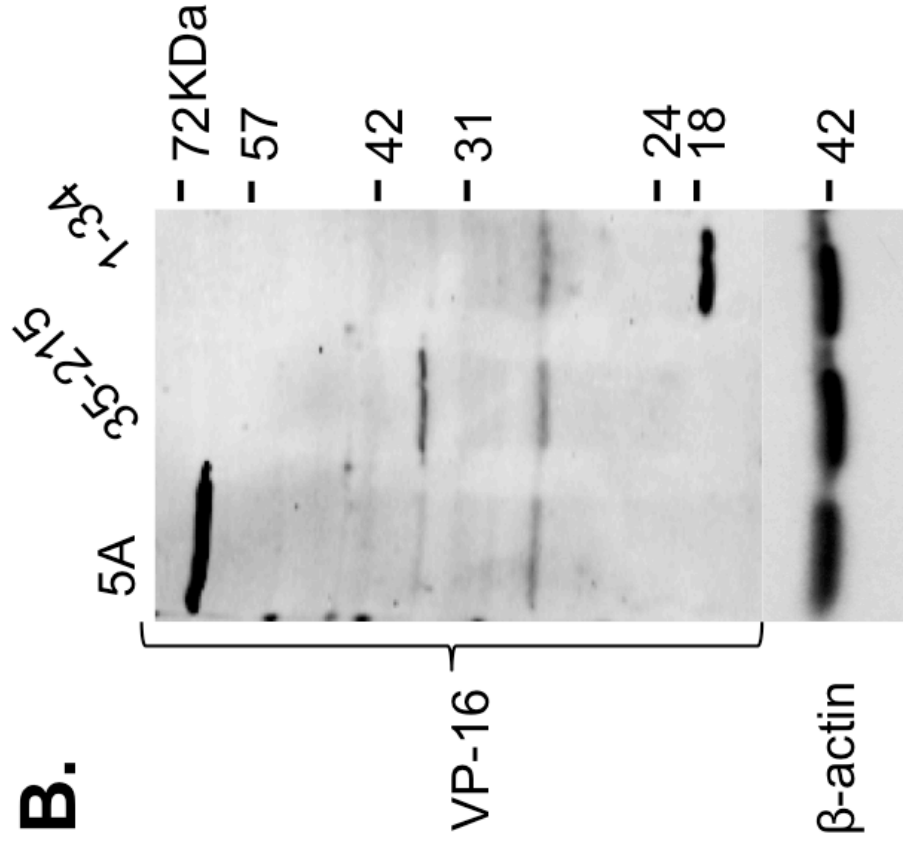

**Figure S3. Analysis of the NS5A interaction domain using the mammalian two-hybrid system.**
